# Supplementary material for: Phenoxyl radicals: H-bonded and coordinated to Cu(ii) and Zn(ii)
Source: Royal Society of Chemistry journal article supplement (doi:10.1039/b513221p), 2005-11-09
Supplement: b513221p.pdf [file b513221p.pdf]

**Table SI1** C-O, N-C, and C-C bond lengths in the structures of: (a)  ${}^{\text{Bz}}\text{LH}\cdot 0.5\text{H}_2\text{O}$  and (b)  ${}^{\text{PhOMe}}\text{LH}$ .

**Figure SI1** Schematic representation of the intermolecular H-bonds in  ${}^{\text{Bz}}\text{LH}\cdot 0.5\text{H}_2\text{O}$ .

**Table SI2** C-O, N-C, and C-C bond lengths in: (a) **1**·4MeCN; (b) **2**·2MeOH; (c) **3**·2MeCN; and (d) **4**·2MeCN

**Figure SI2.** (a) Schematic representation of the intramolecular  $\pi$ - $\pi$  interactions between the two ligands L and  $\text{L}^{\text{A}}$  of **2** in **2**·2MeOH. For clarity, only the rings involved in these interactions are shown. (b) A representation of the parameters involved in the interactions Ph/PhO and Ph/IM in **2**. The letter c is used for centroid of a ring and P for plane.

**Table SI3** Geometrical parameters for the  $\pi$ - $\pi$  stacking interactions in **2** in **2**·2MeOH.

**Figure SI3.** X-band EPR spectra of: (top) **1** and (bottom) **2** in  $\text{CH}_2\text{Cl}_2/\text{DMF}$  (9:1) at 77 K.

**Table SI4.** Spin-Hamiltonian parameters for the compounds **1** and **2** obtained by simulation of the X-band frozen solution spectra.

**Table SI1a**

| Bond    | Distance / Å |          | Distance / Å |
|---------|--------------|----------|--------------|
| O1-C19  | 1.349(7)     | C13-C14  | 1.383(10)    |
| O2-C9   | 1.356(10)    | C14-C15  | 1.381(9)     |
| O2-C24  | 1.369(16)    | C15-C16  | 1.367(8)     |
| O2-C24' | 1.36(2)      | C16-C17  | 1.386(9)     |
| O3-C15  | 1.377(7)     | C18-C23  | 1.407(8)     |
| O3-C25  | 1.439(8)     | C18-C19  | 1.393(8)     |
| N2-C3   | 1.387(7)     | C19-C20  | 1.410(8)     |
| N2-C1   | 1.359(7)     | C20-C21  | 1.403(8)     |
| N5-C1   | 1.329(7)     | C20-C26  | 1.537(9)     |
| N5-C4   | 1.383(7)     | C21-C22  | 1.413(8)     |
| C1-C18  | 1.460(8)     | C22-C23  | 1.376(8)     |
| C3-C4   | 1.362(8)     | C22-C30  | 1.533(8)     |
| C3-C6   | 1.477(8)     | C26-C28  | 1.533(12)    |
| C4-C12  | 1.478(8)     | C26-C27  | 1.537(12)    |
| C6-C7   | 1.380(10)    | C26-C29  | 1.539(11)    |
| C6-C11  | 1.385(9)     | C30-C32  | 1.517(9)     |
| C7-C8   | 1.393(11)    | C30-C33  | 1.537(10)    |
| C8-C9   | 1.361(13)    | C30-C32' | 1.52(9)      |
| C9-C10  | 1.357(11)    | C30-C33' | 1.53(5)      |
| C10-C11 | 1.390(10)    | C30-C31' | 1.52(9)      |
| C12-C13 | 1.396(8)     | C30-C31  | 1.528(9)     |
| C12-C17 | 1.386(9)     |          |              |

**Table SI1b**

|          | Distance /Å |           | Distance /Å |
|----------|-------------|-----------|-------------|
| O1-C11   | 1.366(2)    | C6A-C7A   | 1.381(3)    |
| O1A-C11A | 1.378(2)    | C7A-C8A   | 1.398(3)    |
| N2-C3    | 1.381(2)    | C8A-C9A   | 1.378(3)    |
| N2-C1    | 1.363(2)    | C10A-C15A | 1.403(2)    |
| N5-C1    | 1.329(2)    | C10A-C11A | 1.398(2)    |
| N5-C4    | 1.391(2)    | C11A-C12A | 1.414(3)    |
| N2A-C1A  | 1.358(2)    | C12A-C16A | 1.543(3)    |
| N2A-C3A  | 1.386(2)    | C12A-C13A | 1.387(3)    |
| N5A-C1A  | 1.329(2)    | C13A-C14A | 1.407(3)    |
| N5A-C4A  | 1.392(2)    | C14A-C15A | 1.376(3)    |
| C1-C10   | 1.460(3)    | C14A-C20A | 1.532(3)    |
| C3-C4    | 1.400(3)    | C16A-C17A | 1.533(3)    |
| C3-C6    | 1.391(3)    | C16A-C19A | 1.535(3)    |
| C4-C9    | 1.400(3)    | C16A-C18A | 1.539(3)    |
| C6-C7    | 1.378(3)    | C20A-C23A | 1.544(3)    |
| C7-C8    | 1.404(3)    | C20A-C21A | 1.528(3)    |
| C8-C9    | 1.383(3)    | C13-C14   | 1.401(3)    |
| C10-C11  | 1.404(3)    | C14-C20   | 1.535(3)    |
| C10-C15  | 1.402(2)    | C14-C15   | 1.383(3)    |
| C11-C12  | 1.409(3)    | C16-C19   | 1.530(3)    |
| C12-C16  | 1.541(3)    | C16-C18   | 1.537(3)    |
| C12-C13  | 1.391(3)    | C16-C17   | 1.538(3)    |
| C1A-C10A | 1.459(2)    | C20-C23   | 1.530(3)    |
| C3A-C6A  | 1.387(3)    | C20-C21   | 1.526(3)    |
| C3A-C4A  | 1.407(3)    | C20-C22   | 1.531(3)    |
| C4A-C9A  | 1.390(3)    |           |             |

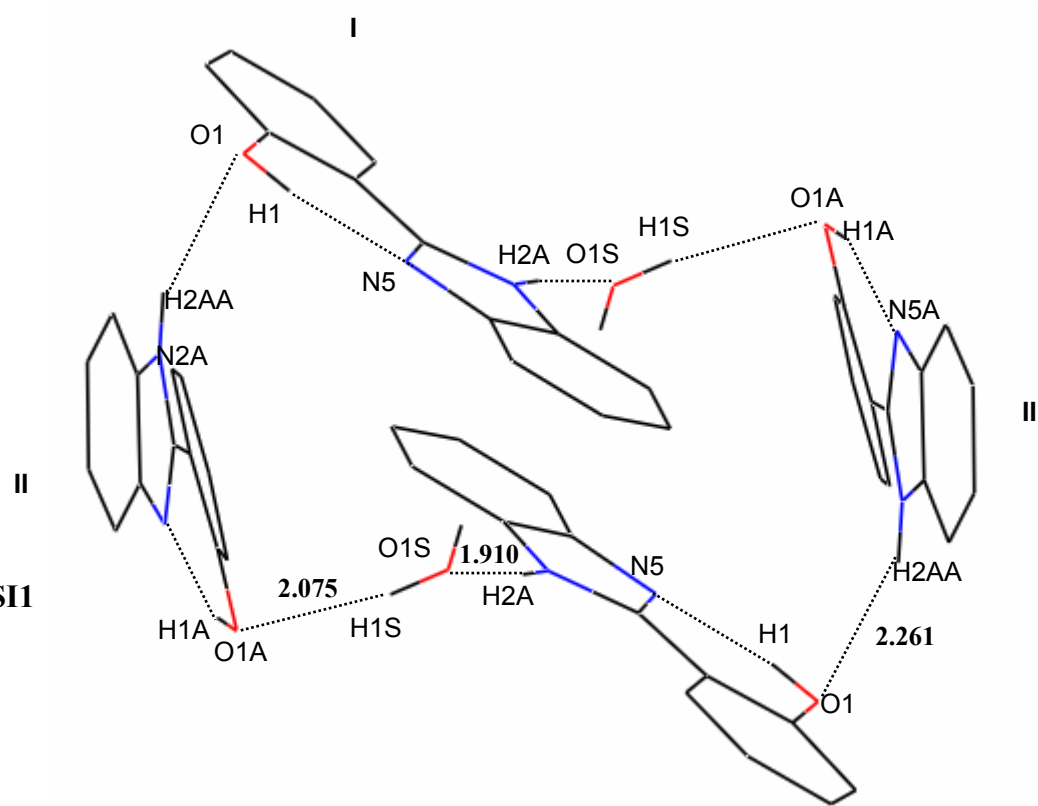

Figure S11

**Table SI2a**

| Bond        | Distance / Å | Bond          | Distance / Å | Bond          | Distance / Å |
|-------------|--------------|---------------|--------------|---------------|--------------|
| C(1)-N(5)   | 1.346(4)     | C(16)-C(19)   | 1.530(5)     | C(11A)-C(12A) | 1.427(5)     |
| C(1)-N(2)   | 1.364(4)     | C(16)-C(18)   | 1.532(5)     | C(12A)-C(13A) | 1.383(5)     |
| C(1)-C(10)  | 1.449(5)     | C(16)-C(17)   | 1.547(6)     | C(12A)-C(16A) | 1.534(5)     |
| O(1)-C(11)  | 1.325(4)     | C(20)-C(21)   | 1.514(6)     | C(13A)-C(14A) | 1.408(5)     |
| N(2)-C(3)   | 1.382(5)     | C(20)-C(23)   | 1.536(6)     | C(14A)-C(15A) | 1.377(5)     |
| C(3)-C(4)   | 1.390(5)     | C(20)-C(22)   | 1.543(6)     | C(14A)-C(20A) | 1.549(5)     |
| C(3)-C(9)   | 1.396(5)     | O(1A)-C(11A)  | 1.329(4)     | C(16A)-C(19A) | 1.533(5)     |
| C(4)-C(6)   | 1.381(5)     | C(1A)-N(5A)   | 1.341(4)     | C(16A)-C(18A) | 1.540(5)     |
| C(4)-N(5)   | 1.406(4)     | C(1A)-N(2A)   | 1.358(4)     | C(16A)-C(17A) | 1.540(5)     |
| C(6)-C(7)   | 1.378(5)     | C(1A)-C(10A)  | 1.456(5)     | C(20A)-C(23A) | 1.516(6)     |
| C(7)-C(8)   | 1.399(6)     | N(2A)-C(3A)   | 1.382(4)     | C(20A)-C(21A) | 1.521(6)     |
| C(8)-C(9)   | 1.379(5)     | C(3A)-C(9A)   | 1.391(5)     | C(20A)-C(22A) | 1.543(6)     |
| C(10)-C(15) | 1.407(5)     | C(3A)-C(4A)   | 1.396(5)     | N(1S)-C(1S)   | 1.133(4)     |
| C(10)-C(11) | 1.414(5)     | C(4A)-C(6A)   | 1.390(5)     | C(1S)-C(2S)   | 1.458(5)     |
| C(11)-C(12) | 1.429(5)     | C(4A)-N(5A)   | 1.405(4)     | N(2S)-C(3S)   | 1.120(6)     |
| C(12)-C(13) | 1.379(5)     | C(6A)-C(7A)   | 1.391(5)     | C(3S)-C(4S)   | 1.440(6)     |
| C(12)-C(16) | 1.534(5)     | C(7A)-C(8A)   | 1.400(5)     | N(3S)-C(5S)   | 1.136(5)     |
| C(13)-C(14) | 1.412(5)     | C(8A)-C(9A)   | 1.378(5)     | C(5S)-C(6S)   | 1.456(5)     |
| C(14)-C(15) | 1.374(5)     | C(10A)-C(15A) | 1.403(5)     | N(4S)-C(7S)   | 1.146(6)     |
| C(14)-C(20) | 1.541(5)     | C(10A)-C(11A) | 1.417(5)     | C(7S)-C(8S)   | 1.454(7)     |

**TableSI2b**

| Bond         | Distance / Å | Bond          | Distance / Å |
|--------------|--------------|---------------|--------------|
| Cu(1)-O(1)   | 1.890(4)     | O(3A)-C(15A)  | 1.377(8)     |
| Cu(1)-O(1A)  | 1.917(4)     | O(3A)-C(25A)  | 1.420(8)     |
| Cu(1)-N(5)   | 1.946(5)     | O(1SA)-C(1SA) | 1.416(8)     |
| Cu(1)-N(5A)  | 1.973(5)     | O(1S)-C(1S)   | 1.439(9)     |
| O(1)-C(19)   | 1.323(8)     | N(2)-C(1)     | 1.369(9)     |
| O(1A)-C(19A) | 1.344(8)     | N(2)-C(3)     | 1.381(8)     |
| O(2)-C(9)    | 1.366(8)     | N(2A)-C(3A)   | 1.383(9)     |
| O(2)-C(24)   | 1.428(8)     | N(2A)-C(1A)   | 1.332(9)     |
| O(2A)-C(9A)  | 1.368(7)     | N(5)-C(1)     | 1.336(9)     |
| O(2A)-C(24A) | 1.416(8)     | N(5)-C(4)     | 1.385(8)     |
| O(3)-C(15)   | 1.372(8)     | N(5A)-C(4A)   | 1.407(8)     |
| O(3)-C(25)   | 1.420(8)     | N(5A)-C(1A)   | 1.354(9)     |

**Table SI2c**

| Bond        | Distance / Å | Bond        | Distance / Å |
|-------------|--------------|-------------|--------------|
| O(1)-C(11)  | 1.331(2)     | C(11)-C(12) | 1.431(3)     |
| C(1)-N(5)   | 1.343(2)     | C(12)-C(13) | 1.387(3)     |
| C(1)-N(2)   | 1.362(2)     | C(12)-C(16) | 1.544(3)     |
| C(1)-C(10)  | 1.459(3)     | C(13)-C(14) | 1.396(3)     |
| N(2)-C(3)   | 1.384(2)     | C(14)-C(15) | 1.382(3)     |
| C(3)-C(6)   | 1.390(3)     | C(14)-C(20) | 1.541(3)     |
| C(3)-C(4)   | 1.398(3)     | C(16)-C(19) | 1.539(3)     |
| C(4)-N(5)   | 1.389(2)     | C(16)-C(18) | 1.539(3)     |
| C(4)-C(9)   | 1.394(3)     | C(16)-C(17) | 1.542(3)     |
| C(6)-C(7)   | 1.379(3)     | C(20)-C(23) | 1.534(3)     |
| C(7)-C(8)   | 1.401(3)     | C(20)-C(22) | 1.534(3)     |
| C(8)-C(9)   | 1.384(3)     | C(20)-C(21) | 1.538(3)     |
| C(10)-C(15) | 1.405(2)     | N(1S)-C(1S) | 1.131(3)     |
| C(10)-C(11) | 1.425(3)     | C(1S)-C(2S) | 1.457(3)     |

**Table SI2d**

| Bond         | Distance / Å | Bond         | Distance / Å | Bond          | Distance / Å |
|--------------|--------------|--------------|--------------|---------------|--------------|
| O(1)-C(19)   | 1.322(2)     | C(18)-C(19)  | 1.423(3)     | C(7A)-C(8A)   | 1.369(3)     |
| C(1)-N(5)    | 1.342(2)     | C(19)-C(20)  | 1.431(3)     | C(8A)-C(9A)   | 1.389(3)     |
| C(1)-N(2)    | 1.365(2)     | C(20)-C(21)  | 1.386(3)     | C(9A)-C(10A)  | 1.386(3)     |
| C(1)-C(18)   | 1.469(3)     | C(20)-C(26)  | 1.542(3)     | C(10A)-C(11A) | 1.389(3)     |
| N(2)-C(3)    | 1.384(2)     | C(21)-C(22)  | 1.404(3)     | C(12A)-C(13A) | 1.384(3)     |
| O(2)-C(9)    | 1.371(2)     | C(22)-C(23)  | 1.382(3)     | C(12A)-C(17A) | 1.397(3)     |
| O(2)-C(24)   | 1.428(3)     | C(22)-C(30)  | 1.540(3)     | C(13A)-C(14A) | 1.392(3)     |
| C(3)-C(4)    | 1.369(3)     | C(26)-C(27)  | 1.538(3)     | C(14A)-C(15A) | 1.382(3)     |
| C(3)-C(6)    | 1.473(3)     | C(26)-C(29)  | 1.542(3)     | C(15A)-C(16A) | 1.389(3)     |
| O(3)-C(15)   | 1.397(3)     | C(26)-C(28)  | 1.545(3)     | C(16A)-C(17A) | 1.383(3)     |
| O(3)-C(25)   | 1.404(5)     | C(30)-C(32)  | 1.516(4)     | C(18A)-C(23A) | 1.405(3)     |
| O(3')-C(15)  | 1.395(5)     | C(30)-C(31)  | 1.532(4)     | C(18A)-C(19A) | 1.429(3)     |
| O(3')-C(25') | 1.412(8)     | C(30)-C(33)  | 1.532(4)     | C(19A)-C(20A) | 1.432(3)     |
| C(4)-N(5)    | 1.390(2)     | O(1A)-C(19A) | 1.318(2)     | C(20A)-C(21A) | 1.395(3)     |
| C(4)-C(12)   | 1.479(3)     | C(1A)-N(5A)  | 1.344(2)     | C(20A)-C(26A) | 1.540(3)     |
| C(6)-C(11)   | 1.394(3)     | C(1A)-N(2A)  | 1.354(3)     | C(21A)-C(22A) | 1.398(3)     |
| C(6)-C(7)    | 1.398(3)     | C(1A)-C(18A) | 1.469(3)     | C(22A)-C(23A) | 1.379(3)     |
| C(7)-C(8)    | 1.377(3)     | N(2A)-C(3A)  | 1.382(2)     | C(22A)-C(30A) | 1.547(3)     |
| C(8)-C(9)    | 1.397(3)     | O(2A)-C(9A)  | 1.367(3)     | C(26A)-C(29A) | 1.538(4)     |
| C(9)-C(10)   | 1.389(3)     | O(2A)-C(24A) | 1.424(3)     | C(26A)-C(27A) | 1.539(3)     |
| C(10)-C(11)  | 1.395(3)     | C(3A)-C(4A)  | 1.370(3)     | C(26A)-C(28A) | 1.545(4)     |
| C(12)-C(17)  | 1.382(3)     | C(3A)-C(6A)  | 1.469(3)     | C(30A)-C(31A) | 1.526(3)     |
| C(12)-C(13)  | 1.394(3)     | O(3A)-C(15A) | 1.372(3)     | C(30A)-C(33A) | 1.534(3)     |
| C(13)-C(14)  | 1.387(3)     | O(3A)-C(25A) | 1.427(3)     | C(30A)-C(32A) | 1.538(3)     |
| C(14)-C(15)  | 1.378(4)     | C(4A)-N(5A)  | 1.389(3)     | C(1S)-C(2S)   | 1.467(4)     |
| C(15)-C(16)  | 1.377(4)     | C(4A)-C(12A) | 1.474(3)     | C(2S)-N(3S)   | 1.138(3)     |
| C(16)-C(17)  | 1.398(3)     | C(6A)-C(11A) | 1.386(3)     | C(4S)-C(5S)   | 1.468(3)     |
| C(18)-C(23)  | 1.409(3)     | C(6A)-C(7A)  | 1.402(3)     | C(5S)-N(6S)   | 1.122(3)     |

**Figure SI2a**

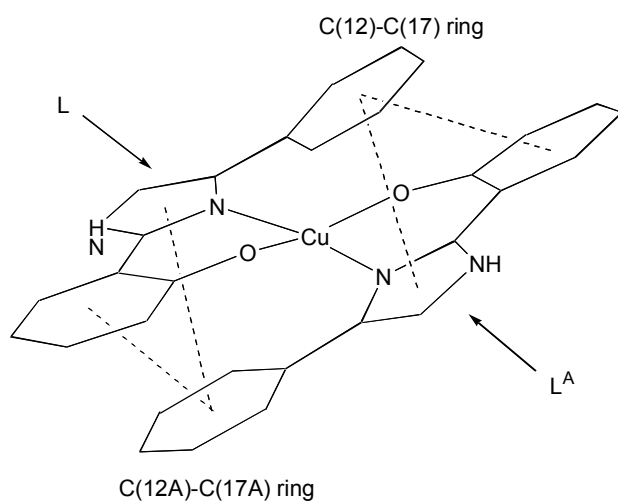

**Figure SI2b**

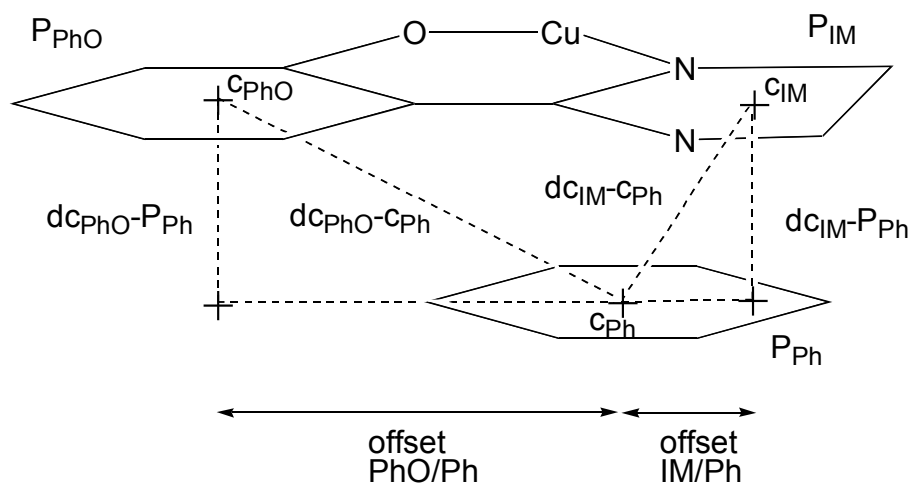





**Table SI3**

| Interaction | Angle between $P_{Ph}$ and $P_{IM}$ /° | $d_{C_{IM}C_{Ph}}$ /Å | $d_{C_{IM}P_{Ph}}$ /Å | Offset Ph/IM /Å | Angle between $P_{Ph}$ and $P_{IM}$ /° | $d_{C_{PhO}C_{Ph}}$ /Å | $d_{C_{PhO}P_{Ph}}$ /Å | Offset Ph/IM /Å | Angle between PhO and IM /° |      |
|-------------|----------------------------------------|-----------------------|-----------------------|-----------------|----------------------------------------|------------------------|------------------------|-----------------|-----------------------------|------|
|             |                                        |                       |                       |                 |                                        |                        |                        |                 | L                           | L(A) |
| Ph/IM(A)    | 15.2                                   | 3.54                  | 3.46                  | 0.75            |                                        |                        |                        |                 |                             |      |
| Ph(A)/IM    | 14.0                                   | 3.43                  | 3.42                  | 0.19            |                                        |                        |                        |                 |                             |      |
| Ph/PhO(A)   |                                        |                       |                       |                 | 10.3                                   | 4.62                   | 3.59                   | 2.91            |                             |      |
| Ph(A)/PhO   |                                        |                       |                       |                 | 9.4                                    | 5.40                   | 3.25                   | 4.30            | 8.1                         | 21.7 |

**Figure SI3.**

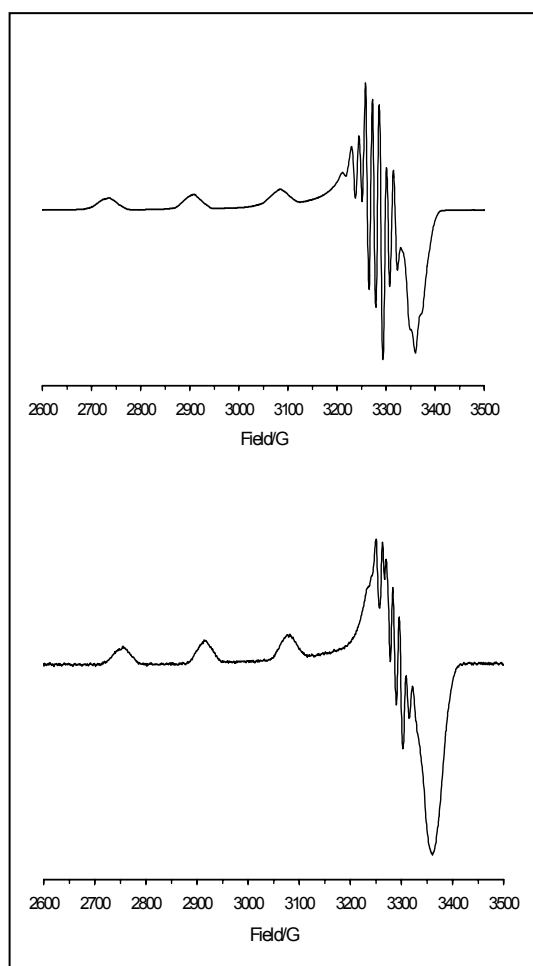

**Table SI4.**

| Compounds | $g_{zz}$ | $g_{xx/yy}$ | $A_{zz}\{^{63,65}\text{Cu}\}/\text{G}$ | $A_{xx/yy}\{^{63,65}\text{Cu}\}/\text{G}$ | $a_{zz}\{^{14}\text{N}\}/\text{G}$ | $a_{xx/yy}\{^{14}\text{N}\}/\text{G}$ |
|-----------|----------|-------------|----------------------------------------|-------------------------------------------|------------------------------------|---------------------------------------|
| <b>1</b>  | 2.254    | 2.048       | 165                                    | 21                                        | 10                                 | 13                                    |
| <b>2</b>  | 2.254    | 2.048       | 164                                    | 19                                        | 10                                 | 13                                    |
